# Supplementary material for: TRIM35 mediates protection against influenza infection by activating TRAF3 and degrading viral PB2
Source: PubMed Central journal article supplement (PMC7719147; doi:10.1007/s13238-020-00734-6), 2020-06-19
Supplement: 13238_2020_734_MOESM1_ESM.pdf [file 13238_2020_734_MOESM1_ESM.pdf]

**Table S1. Sequence analysis of residue 736 in the PB2 protein of IAV strains.**

| Total number of IAV strains analyzed <sup>a</sup> | Number and percentage of IAV strains with the indicated residue at position 736 of PB2 |        |                |
|---------------------------------------------------|----------------------------------------------------------------------------------------|--------|----------------|
|                                                   | Residue                                                                                | Number | Percentage (%) |
| 59520                                             | K                                                                                      | 59508  | 99.98          |
|                                                   | R                                                                                      | 8      | 0.013          |
|                                                   | unknown                                                                                | 4      | 0.007          |

<sup>a</sup>Sequences were derived from the Influenza Research Database, and were analyzed by using the ‘Analyze & Visualize’ module.

**Table S2. SiRNAs used for gene silencing.**

| siRNA                          | Sequences (5'-3')            |
|--------------------------------|------------------------------|
| human <i>TRIM35</i> -sense     | 5'-GCAGGAGUUUGAUAAGCUUTT-3'  |
| human <i>TRIM35</i> -antisense | 5'-AAGCUUAUCAAAACUCCUGCTT-3' |
| mouse <i>Trim35</i> -sense     | 5'-CCAACCACACGCUCAACAATT-3'  |
| mouse <i>Trim35</i> -antisense | 5'-UUGUUGAGCGUGUGGUUGGTT-3'  |
| Scrambled-sense                | 5'-UUCUCCGAACGUGUCACGUTT-3'  |
| Scrambled-antisense            | 5'-ACGUGACACGUU CGGAGAATT-3' |

**Table S3. Primers used for RNA quantification.**

| Primers                          | Sequences (5'-3')       |
|----------------------------------|-------------------------|
| <i>hIFNB1-F</i>                  | ATGACCAACAAGTGTCTCCTCC  |
| <i>hIFNB1-R</i>                  | GCTCATGGAAAGAGCTGTAGTG  |
| <i>hIL6-F</i>                    | CCTTCCAAAAATGGCAGAAA    |
| <i>hIL6-R</i>                    | TCGATGCTTCCCTTATCACC    |
| <i>hISG56-F</i>                  | GCCTTGCTGAAGTGTGGAGGAA  |
| <i>hISG56-R</i>                  | ATCCAGGCGATAGGCAGAGATC  |
| <i>hTNF<math>\alpha</math>-F</i> | GCCGCATCGCCGTCTCCTAC    |
| <i>hTNF<math>\alpha</math>-R</i> | CCTCAGCCCCCTCTGGGGTC    |
| <i>hACTIN-F</i>                  | CCTTCCTGGGCATGGAGTCCTG  |
| <i>hACTIN-R</i>                  | GGAGCAATGATCTTGATCTTC   |
| <i>hTRIM35-F</i>                 | CTTGAGAGTGGAGGAGCAGG    |
| <i>hTRIM35-R</i>                 | GCGTTTTTCGGCTCTTGTGTT   |
| <i>mIfnb1-F</i>                  | CCCTATGGAGATGACGGAGA    |
| <i>mIfnb1-R</i>                  | CTGTCTGCTGGTGGAGTTCA    |
| <i>mIl6-F</i>                    | CTGCAAGAGACTTCCATCCAG   |
| <i>mIl6-R</i>                    | AGTGGTATAGACAGGTCTGTTGG |
| <i>mIsg56-F</i>                  | TGCGATCCACAGTGAACAAC    |
| <i>mIsg56-R</i>                  | ACTTCCGGGAAATCGATGAG    |
| <i>mTnfa-F</i>                   | CAGGCGGTGCCTATGTCTC     |
| <i>mTnfa-R</i>                   | CGATCACCCCGAAGTTCAGTAG  |
| <i>mActin-F</i>                  | CCACACCCGCCACCAGTTCG    |
| <i>mActin-R</i>                  | TACAGCCCGGGGAGCATCGT    |
| <i>mTrim35-F</i>                 | CAAGGACACTGCGCAAGACTTC  |
| <i>mTrim35-R</i>                 | TGCTTGGCAATGGCCTCATA    |

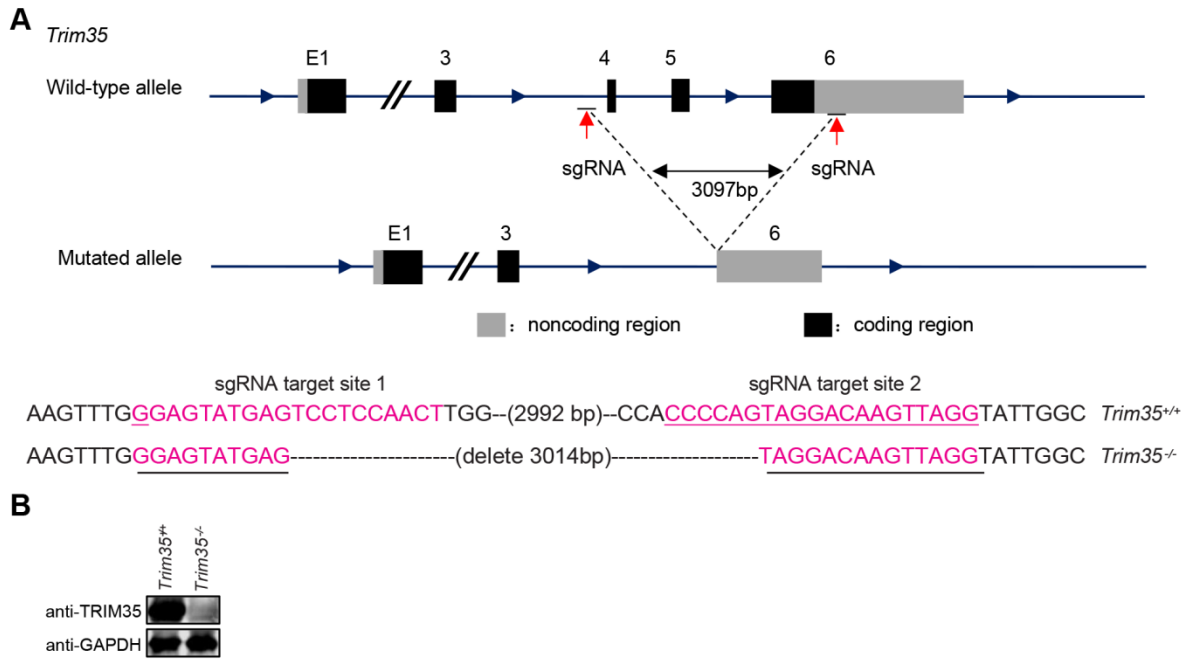

**Figure S1. Generation of *Trim35*<sup>-/-</sup> mice by CRISPR/Cas9-mediated gene knockout. A)** Schematic illustration of the strategy used to generate *Trim35*<sup>-/-</sup> mice. Two sgRNAs were designed to delete exons 4 to 6 of the *Trim35* gene. **B)** IB analysis of lung extracts of *Trim35*<sup>+/+</sup> and *Trim35*<sup>-/-</sup> mice.

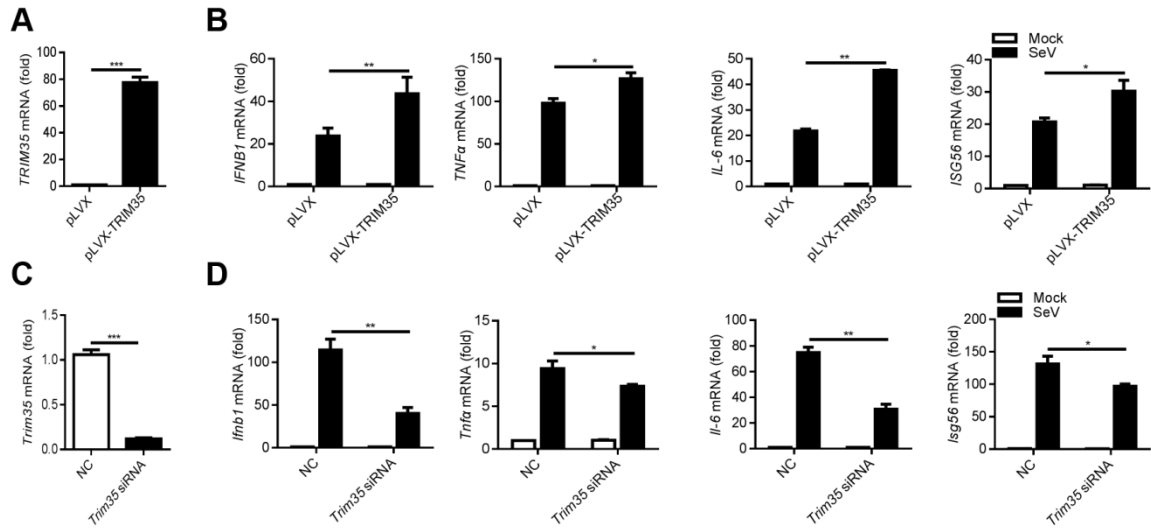

**Figure S2. TRIM35 positively regulates the expression of IFN- $\beta$  signaling pathway genes in THP-1 and RAW264.7 cells.** **A)** Establishment of a stable lentiviral-mediated THP-1 cell line overexpressing TRIM35, confirmed by RT-qPCR. **B)** RT-qPCR analysis of the mRNA levels of the indicated genes in TRIM35-overexpressing or control THP-1 cells from **A)** that were left uninfected or were infected with SeV for 12 h. **C)** RT-qPCR analysis to assess the knockdown of TRIM35 in RAW264.7 cells transfected with *Trim35*-specific or scrambled siRNA for 36 h. **D)** RT-qPCR analysis of the mRNA levels of the indicated genes in siRNA-treated RAW264.7 cells from **C)** that were left uninfected or were infected with SeV for 12 h. Data are representative of at least three independent experiments. Means  $\pm$  SD are shown in **A)**-**D)** (n=3). Two-tailed unpaired t-test was used for the statistical analysis, \* $P < 0.05$ , \*\* $P < 0.01$ , \*\*\* $P < 0.001$ .

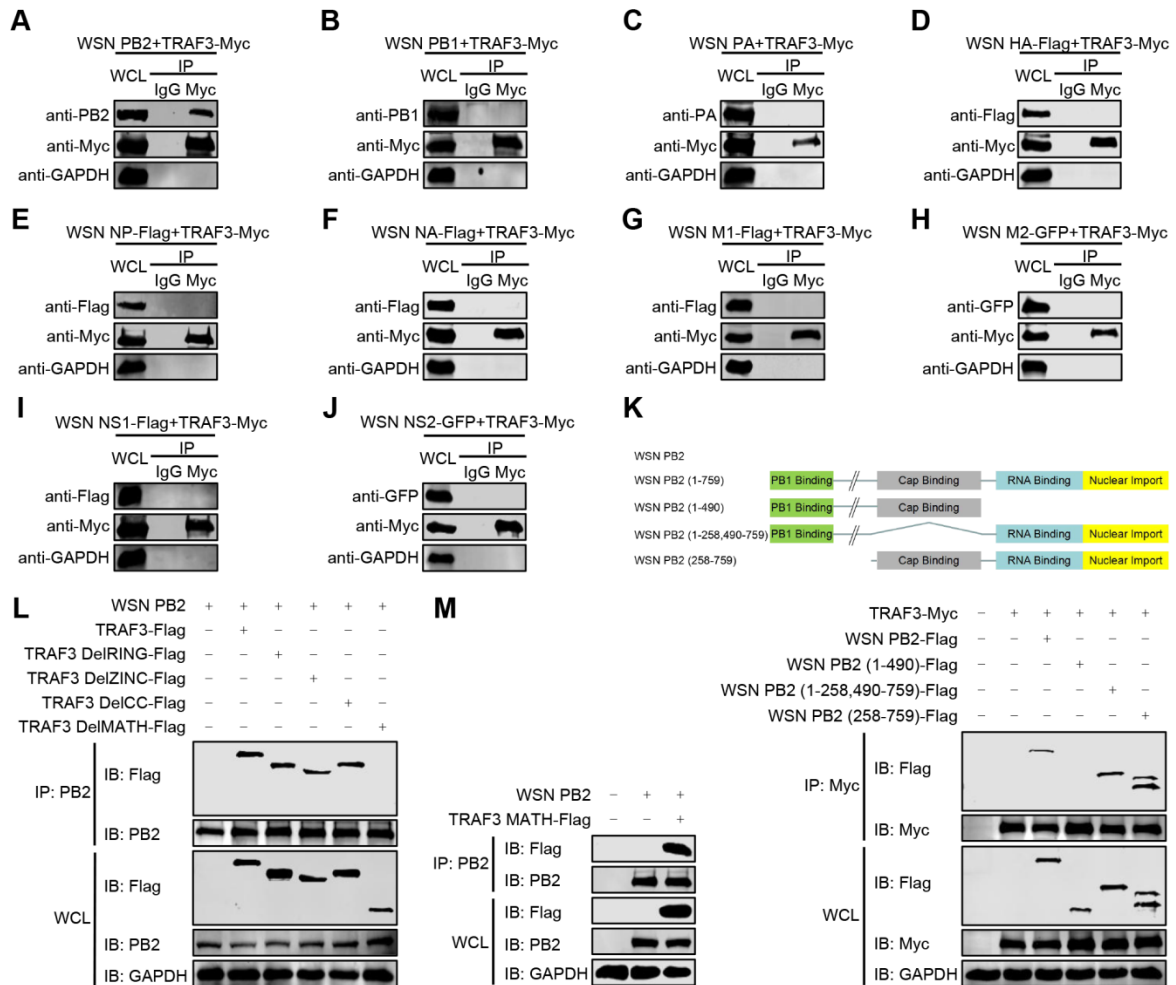

**Figure S3. IAV PB2 interacts with TRAF3.** A)-J) Co-IP and IB analysis of HEK293T cells expressing TRAF3-Myc and WSN (H1N1) PB2 A), PB1 B), PA C), HA-Flag D), NP-Flag E), NA-Flag F), M1-Flag G), M2-GFP H), NS1-Flag I), or NS2-GFP J). K) Binding of Flag-tagged WSN (H1N1) PB2 or its truncation mutants with TRAF3-Myc in transiently transfected HEK293T cells, as determined by co-IP and IB analysis. WSN (H1N1) PB2 domains and truncation mutants were shown on top. L) Binding of Flag-tagged TRAF3 or its truncation mutants with WSN (H1N1) PB2 in transiently transfected HEK293T cells, as determined by co-IP and IB analysis. M) Binding of Flag-tagged TRAF3 MATH domain with WSN (H1N1) PB2 in transiently transfected HEK293T cells, as determined by co-IP and IB analysis. Data are representative of at least three independent experiments.

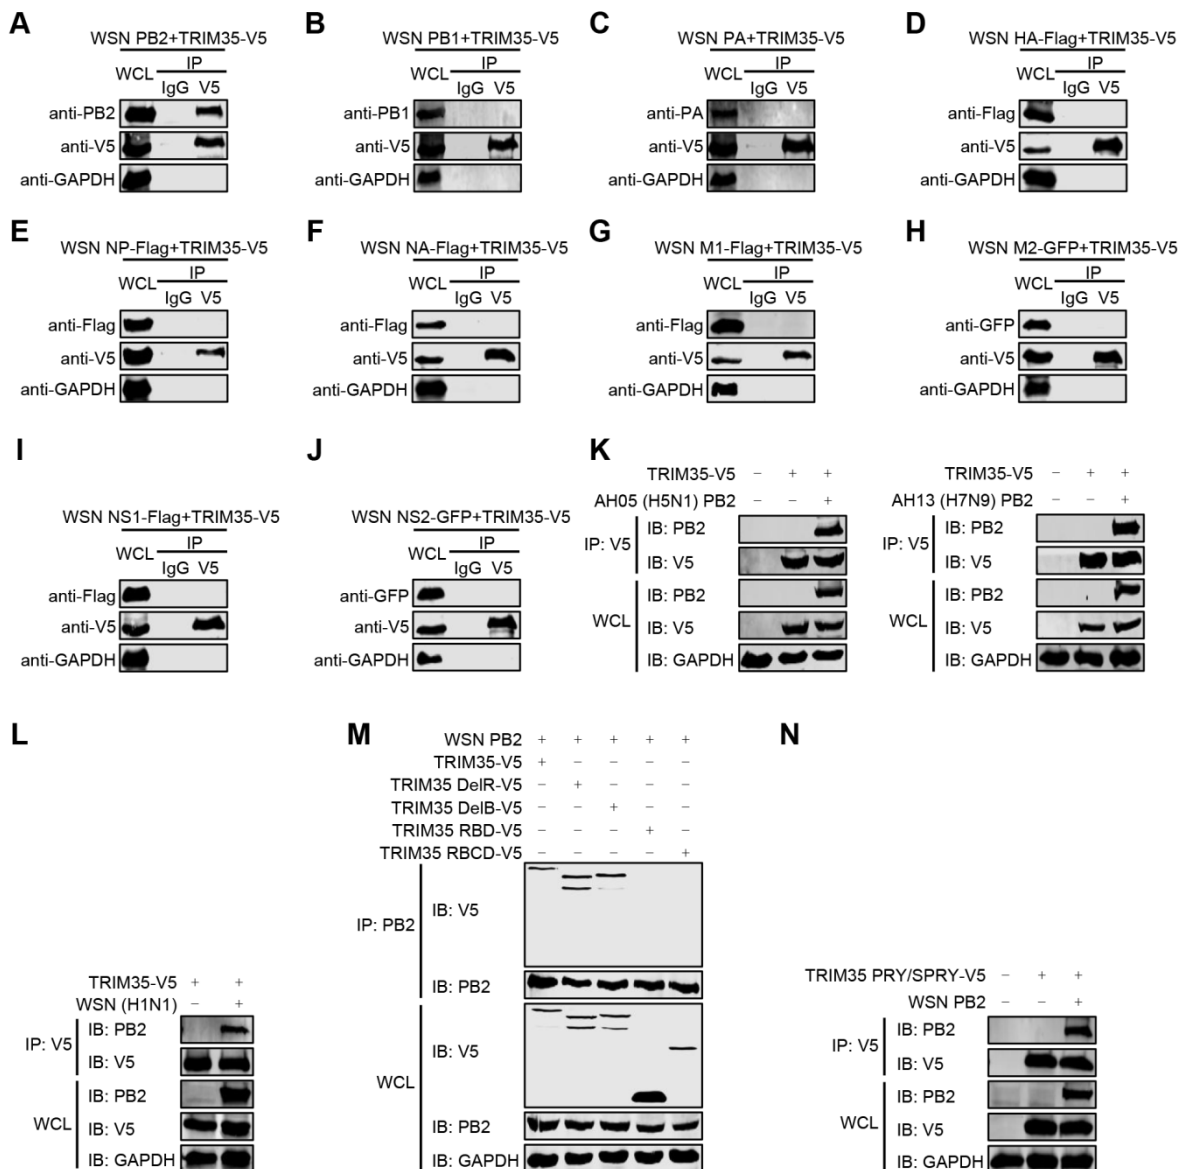

**Figure S4. TRIM35 interacts with IAV PB2.** A)-J) Co-IP and IB analysis of HEK293T cells expressing TRIM35-V5 and WSN (H1N1) PB2 **A**), PB1 **B**), PA **C**), HA-Flag **D**), NP-Flag **E**), NA-Flag **F**), M1-Flag **G**), M2-GFP **H**), NS1-Flag **I**), or NS2-GFP **J**). **K**) Co-IP and IB analysis of HEK293T cells expressing TRIM35-V5 and AH05 (H5N1) PB2 or AH13 (H7N9) PB2. **L**) Co-IP and IB analysis of HEK293T cells transfected with plasmid expressing TRIM35-V5 for 36 h, followed by infection with WSN (H1N1) virus for 12 h. **M**) Binding of V5-tagged TRIM35 or its truncation mutants with WSN (H1N1) PB2 in transiently transfected HEK293T cells, as determined by co-IP and IB analysis. **N**) Binding of V5-tagged TRIM35 PRY/SPRY domain with WSN (H1N1) PB2 in transiently transfected HEK293T cells, as determined by co-IP and IB analysis. Data are representative of at least three independent experiments.

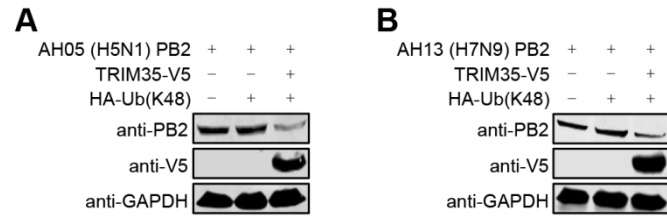

**Figure S5. TRIM35-mediated K48-linked polyubiquitination leads to degradation of the PB2 protein of different IAVs. A) and B) IB analysis of HEK293T cells transfected for 36 h with plasmids expressing AH05 (H5N1) PB2 A) or AH13 (H7N9) PB2 B), with or without TRIM35-V5 and HA-ubiquitin (K48). Data are representative of at least three independent experiments.**
